# Supplementary material
Source: publisher site journal article supplement (https://www.spandidos-publications.com/909/downloadSupplementary)
Supplement: Supplementary file 1 [file downloadSupplementary]

## Sheet: Sheet1
Table SIII: FISH results on all samples. Mean signals per nucleus; highest copy number of corresponding markers (% of nuclei with highest copy number). Green shading diploid, red shading aneuploid
Sample	Cen3	3q28 (TP63)	Cen7	7p11.2 (EGFR)	Cen8	8q24.3 (PTK2)	Cen11	11q13.3 (CCND1)	20pter	20q13.12 (MMP9)
D 1i	1.67; 4n(0.5)	1.58; 3n(0.5)	1.61; 3n(2.5)	1.53; 3n(0.5)	1.56; 3n(1.5)	1.51; ≤2n(100)	1.54; 3n(0.5)	1.57; 3n(0.5)	1.66; 3n(1.0)	1.64; ≤2n(100)
D 1ii	1.54; 3n(4.0)	1.44; 3n(0.5)	1.74; 4n(0.5)	1.71; 4n(0.5)	1.58; 3n(1.0)	1.48; ≤2n(100)	1.43; ≤2n(100)	1.48; 3n(0.5)	1.64; ≤2n(100)	1.68; 3n(0.5)
D 2i	1.49; ≤2n(100)	1.41; 3n(1.0)	1.41; ≤2n(100)	1.37; ≤2n(100)	1.59; 3n(2.0)	1.55; 3n(0.5)	1.52; 3n(2.0)	1.57; 3n(0.5)	1.49; ≤2n(100)	1.50; ≤2n(100)
D 2ii	1.56; 3n(0.5)	1.50; 4n(0.5)	1.46; 3n(0.5)	1.43; 3n(0.5)	1.68; 3n(2.0)	1.64; 3n(3.0)	1.42; 4n(0.5)	1.66; ≤2n(100)	1.62; 3n(1.5)	1.54; 3n(0.5)
D 3i	1.42; ≤2n(100)	1.44; 3n(1.0)	1.43; 3n(1.5)	1.37; 3n(1.0)	1.53; 3n(2.0)	1.46; 3n(2.0)	1.41; 3n(1.5)	1.56; 3n(1.5)	1.53; 4n(0.5)	1.55; 4n(0.5)
D 3ii	1.36; 3n(0.5)	1.34; ≤2n(100)	1.33; 3n(0.5)	1.32; ≤2n(100)	1.52; 3n(3.0)	1.47; 3n(2.5)	1.32; 3n(1.0)	1.49; ≤2n(100)	1.54; 3n(1.5)	1.53; ≤2n(100)
D 3iii	1.45; 3n(0.5)	1.44; 3n(1.5)	1.51; 3n(0.5)	1.45; ≤2n(100)	1.63; 3n(3.5)	1.58; 3n(2.5)	1.42; 3n(1.0)	1.50; 3n(1.5)	1.76; 3n(7.5)	1.39; ≤2n(100)
D 4i	1.36; 3n(0.5)	1.53; 3n(0.5)	1.60; 3n(2.0)	1.6; 3n(2.5)	1.51; 3n(1.5)	1.41; 3n(1.5)	1.29; 3n(1.5)	1.45; 3n(0.5)	1.45; ≤2n(100)	1.39; ≤2n(100)
D 4ii	1.49; 3n(0.5)	1.47; 3n(0.5)	1.58; 3n(0.5)	1.52; 3n(0.5)	1.60; 3n(0.5)	1.44; 3n(0.5)	1.43; ≤2n(100)	1.69; 3n(1.0)	1.6; 3n(0.5)	1.59; ≤2n(100)
D 5ai	1.36; ≤2n(100)	1.39; ≤2n(100)	1.36; 3n(1.7)	1.33; 3n(0.6)	1.65; 3n(2.0)	1.54; 3n(1.0)	1.48; ≤2n(100)	1.63; 3n(0.5)	1.57; ≤2n(100)	1.45; ≤2n(100)
D 5aii	1.50; 3n(1.0)	1.53; ≤2n(100)	1.40; 3n(0.5)	1.40; 3n(0.5)	1.66; 3n(2.5)	1.57; 3n(0.5)	1.42; ≤2n(100)	1.52; ≤2n(100)	1.60; ≤2n(100)	1.56; ≤2n(100)
D 5b	1.49; ≤2n(100)	1.50; ≤2n(100)	1.29; 3n(0.8)	1.34; 3n(0.8)	1.65; 3n(1.0)	1.65; 3n(2.5)	1.44; ≤2n(100)	1.52; ≤2n(100)	1.63; 3n(4.5)	1.53; 3n(3.5)
D 6i	1.55; 3n(0.5)	1.46; 3n(1.0)	1.48; ≤2n(100)	1.48; ≤2n(100)	1.34; ≤2n(100)	1.42; 3n(0.5)	1.54; 3n(1.0)	1.63; 3n(0.5)	1.51; ≤2n(100)	1.49; 4n(0.5)
D 6ii	1.56; 4n(1.0)	1.49; ≤2n(100)	1.51; ≤2n(100)	1.50; ≤2n(100)	1.68; 4n(0.5)	1.5; 3n(1.0)	1.60; ≤2n(100)	1.66; ≤2n(100)	1.6; 3n(2.0)	1.58; ≤2n(100)
D 7a	1.44; ≤2n(100)	1.45; ≤2n(100)	1.48; ≤2n(100)	1.44; ≤2n(100)	1.44; ≤2n(100)	1.39; ≤2n(100)	1.66; 3n(5.5)	1.63; 3n(1.0)	1.72; 4n(1.0)	1.37; 3n(2.0)
D 7b	1.62; 4n(0.5)	1.60; 4n(0.5)	1.48; 4n(0.5)	1.42; 3n(1.0)	1.68; 3n(2.0)	1.72; 3n(3.5)	1.66; 3n(3.0)	1.73; 3n(1.5)	1.57; 3n(1.0)	1.47; 3n(0.5)
A 1i	2.23; ≥5(1.5)	2.36; ≥5(2.5)	2.08; ≥5(1.0)	2.19; ≥5(1.0)	1.97; ≥5(1.5)	2.24; ≥5(2.5)	2.08; ≥5(0.5)	2.27; ≥5(2.5)	2.4; ≥5(3.0)	2.16; ≥5(1.0)
A 1ii	2.57; ≥5(5.5)	2.38; ≥5(3.0)	1.84; 4n(3.0)	1.94; ≥5(0.5)	2.53; ≥5(5.5)	2.66; ≥550.5)	1.85; 4n(1.5)	1.85; 4n(1.0)	2.42; ≥5(1.5)	2.46; ≥5(1.5)
A 2ai	1.35; 3n(2.5)	1.32; 3n(2.5)	1.56; 3n(7.0)	1.42; 4n(0.5)	1.54; 3n(6.0)	1.42; 4n(1.0)	1.37; 3n(2.0)	1.39; 3n(2.5)	1.41; 4n(0.5)	1.24; 3n(2.0)
A 2aii	1.58; ≥5(0.5)	1.52; 4n(0.5)	1.7; 4n(1.0)	1.54; 3n(6.0)	1.5; 3n(6.5)	1.42; 4n(1.0)	1.66; 4n(1.0)	1.69; 4n(2.0)	1.7; 4n(0.5)	1.5; 4n(1.0)
A 2b	1.41; 4n(1.3)	1.30; 3n(1.9)	1.34; 3n(1.5)	1.24; 3n(0.5)	1.39; 3n(2.5)	1.33; 3n(4.0)	1.30; 3n(0.5)	1.35; 3n(1.5)	1.38; 3n(3.0)	1.27; 3n(2.5)
A 3i	1.54; 4n(0.5)	1.53; 3n(4.0)	1.62; 3n(5.0)	1.49; 3n(1.5)	1.56; 3n(4.0)	1.58; 3n(5.0)	1.67; 4n(1.0)	1.77; 3n(7.5)	1.57; 3n(1.0)	1.5; 4n(0.5)
A 3ii	1.61; 4n(0.5)	1.49; 3n(6.0)	2.02; 4n(0.5)	1.98; 4n(0.5)	1.85; ≥5(0.5)	1.8; ≥5(0.5)	1.49; 4n(0.5)	1.71; 3n(4.5)	1.61; 4n(1.0)	1.53; 3n(2.0)
A 4ai	1.74; 4n(2.0)	1.85; ≥5(0.5)	1.87; 3n(15.0)	1.86; 3n(15.0)	1.96; 4n(4.0)	2.0; ≥5(2.5)	2.01; ≥5(0.5)	2.04; 4n(5.5)	1.79; 4n(4.0)	1.70; 4n(1.0)
A 4aii	1.61; 3n(2.5)	1.54; 3n(1.5)	2.01; 4n(3.5)	1.96; 4n(3.5)	1.63; 4n(1.0)	1.53; 4n(0.5)	1.47; 3n(6.0)	1.73; 3n(2.5)	1.59; 3n(2.0)	1.54; 3n(1.0)
A 4b	1.81; ≥5(0.5)	1.79; ≥5(0.5)	1.59; 3n(3.0)	1.62; 3n(2.0)	1.68; 4n(1.5)	1.56; 3n(1.5)	1.79; 4n(0.5)	1.85; 3n(18.0)	2.2; ≥5(0.5)	2.15; 4n(9.5)
A 5a	2.61; ≥5(5.0)	2.64; ≥5(5.5)	2.08; 4n(5.0)	2.10; 4n(5.0)	1.96; ≥5(1.0)	2.52; ≥5(4.0)	1.87; ≥5(1.0)	1.91; 4n(1.5)	2.39; ≥5(1.5)	2.22; ≥5(0.5)
A 5bi	2.81; ≥5(7.5)	2.56; ≥5(4.5)	2.15; 4n(5.0)	2.19; 4n(5.0)	1.74; ≥5(0.5)	2.28; ≥5(1.5)	1.91; ≥5(0.5)	4.35; ≥5(22.0)	2.69; ≥5(1.5)	2.49; ≥5(0.5)
A 5bii	1.68; 3n(2.0)	1.57; 3n(0.5)	NA	NA	1.58; 3n(2.5)	1.51; ≤2n(100)	1.69; 3n(2.0)	1.66; ≤2n(100)	1.54; 4n(0.5)	1.46; 4n(0.5)
A 6i	1.98; 4n(2.5)	1.84; 4n(3.5)	1.55; 4n(0.5)	1.54; 4n(0.5)	2.11; ≥5(2.5)	2.10; ≥5(4.0)	1.93; ≥5(0.5)	2.22; ≥5(4.5)	2.45; ≥5(3.5)	1.88; ≥5(0.5)
A 6ii	2.26; 4n(6.0)	2.18; ≥5(0.5)	1.89; 4n(5.5)	1.93; 4n(5.0)	2.90; ≥5(8.5)	2.59; ≥5(2.5)	2.21; ≥5(1.0)	2.21; ≥5(0.5)	2.28; ≥5(3.0)	2.24; ≥5(1.5)
A 7	2.29; ≥5(1.0)	2.20; ≥5(1.0)	2.34; ≥5(1.5)	2.25; ≥5(1.5)	3.12; ≥5(8.0)	2.41; ≥5(2.0)	2.21; ≥5(1.0)	2.99; ≥5(10.0)	3.27; ≥5(14.5)	2.65; ≥5(1.5)
A 8	4.81; ≥5(53.5)	4.02; ≥5(32.5)	3.29; ≥5(20.0)	2.02; ≥5(3.0)	2.74; ≥5(8.5)	5.04; ≥5(58.0)	3.10; ≥5(13.0)	2.31; ≥5(1.0)	2.40; ≥5(1.0)	2.21; ≥5(4.0)
A 9a	1.87; 4n(3.0)	1.78; 4n(2.5)	2.30; ≥5(1.5)	1.57; 3n(6.0)	1.70; 3n(10.0)	1.73; ≥5(1.5)	1.74; ≥5(1.0)	3.58; ≥5(19.0)	3.02; ≥5(13.5)	1.94; ≥5(0.5)
A 9b	1.63; 3n(4.0)	1.60; 3n(1.0)	1.84; 3n(7.0)	1.83; 3n(7.5)	1.64; 3n(2.5)	1.58; 3n(2.0)	1.58; 3n(3.5)	1.55; 3n(0.5)	1.72; ≥5(0.5)	1.63; ≥5(0.5)
A 9c	1.48; 3n(0.5)	1.36; ≤2n(100)	1.62; 3n(2.5)	1.59; 3n(1.5)	1.38; 3n(0.5)	1.44; 3n(1.5)	1.40; 3n(0.5)	1.44; 2n(43.7)	1.45; 3n(1.0)	1.39; ≤2n(100)
A 9cii	NA	NA	NA	NA	NA	NA	2.14; ≥5(3.3)	8.57; ≥5(63.5)	NA	NA
A 10a	2.02; ≥5(1.5)	2.87; ≥5(8.5)	1.88; 4n(1.0)	1.97; ≥5(1.0)	2.67; ≥5(6.5)	2.15; ≥5(1.0)	1.85; ≥5(0.5)	12.72; ≥5(86.5)	2.79; ≥5(5.0)	1.93; 4n(0.5)
A 10b	1.62; 3n(2.2)	1.67; 4n(1.1)	1.63; 4n(0.5)	1.66; ≥5(0.5)	1.67; 4n(0.5)	1.62; 3n(1.5)	1.61; 3n(2.5)	3.37; ≥5(12.5)	1.72; 4n(0.5)	1.66; ≤2n(100)
A 10c	2.10; ≥5(1.0)	2.88; ≥5(4.0)	1.69; 3n(9.0)	1.73; 3n(11.5)	2.36; ≥5(3.5)	2.21; ≥5(2.5)	1.73; ≥5(1.0)	7.93; ≥5(51.0)	2.27; ≥5(5.0)	1.77; ≥5(0.5)
A 11	1.93; ≥5(0.5)	1.77; ≥5(0.5)	2.04; ≥5(1.0)	1.94; ≥5(0.5)	1.85; ≥5(0.5)	1.86; ≥5(2.0)	1.69; 4n(2.0)	1.82; 4n(4.0)	2.01; 4n(4.5)	1.88; 4n(4.0)
A 12ai	2.01; ≥5(1.5)	3.43; ≥5(17.5)	1.88; ≥5(0.5)	1.90; 4n(0.5)	2.86; ≥5(8.5)	2.11; ≥5(1.5)	1.73; 4n(3.0)	9.16; ≥5(60.0)	2.45; ≥5(2.0)	2.21; ≥5(1.0)
A 12aii	1.90; 4n(1.0)	3.55; ≥5(21.5)	1.80; 3n(16.5)	1.90; 3n(19.5)	3.08; ≥5(9.0)	2.84; ≥5(5.5)	1.92; ≥5(0.5)	8.10; ≥5(64.0)	2.48; ≥5(1.0)	2.25; ≥5(0.5)
A 12bi	1.51; 3n(0.5)	1.55; 3n(2.2)	1.40; 3n(1.0)	1.49; 3n(4.0)	1.56; 3n(2.0)	1.52; 3n(2.5)	1.51; 3n(4.0)	2.74; ≥5(9.0)	1.91; 4n(0.5)	1.69; ≥5(0.5)
A 12bii	2.00; ≥5(0.5)	3.45; ≥5(17.5)	1.72; ≥5(0.5)	11.20; ≥5(72.0)	2.33; ≥5(1.0)	2.22; ≥5(1.5)	1.79; ≥5(0.5)	10.79; ≥5(72.0)	2.38; ≥5(1.0)	2.21; ≥5(0.5)
A 12biii	2.17; ≥5(2.0)	4.22; ≥5(41.5)	1.74; 4n(0.5)	1.77; 4n(0.5)	2.79; ≥5(8.0)	2.69; ≥5(4.0)	1.76; 4n(0.5)	11.54; ≥5(79.0)	2.60; ≥5(0.5)	2.36; ≥5(0.5)
A 12c	2.18; ≥5(1.0)	4.17; ≥5(43.5)	1.91; 4n(2.0)	1.90; 4n(1.5)	3.42; ≥5(14.5)	3.15; ≥5(12.5)	2.70; ≥5(3.0)	2.62; ≥5(2.0)	2.73; ≥5(2.0)	2.50; ≥5(1.0)
